# Supplementary material for: Isolation of hydrazine oxidation products via halogen bonding: C–I bond scission and crystal polymorphism
Source: Royal Society of Chemistry journal article supplement (doi:10.1039/d0ce01568g), 2020-11-23
Supplement: d0ce01568g1.pdf [file d0ce01568g1.pdf]

## Supporting Information

### Isolation of hydrazine oxidation products via halogen bonding: C–I bond scission and crystal polymorphism

Andrew J. Peloquin,<sup>a</sup> Khadijatul Kobra,<sup>a,b</sup> Colin D. McMillen,<sup>a</sup> Scott T. Iacono,<sup>c</sup> and William T. Pennington<sup>\*a</sup>

<sup>a</sup>Department of Chemistry, Clemson University, Clemson, South Carolina (USA)

<sup>b</sup>Currently at Department of Chemistry, Hollins University, Roanoke, VA (USA)

<sup>c</sup>Department of Chemistry & Chemistry Research Center, Laboratories for Advanced Materials, United States Air Force Academy, Colorado Springs, Colorado (USA)

\*Correspondence e-mail: billp@clemson.edu

#### Table of Contents

|                                                                       |      |
|-----------------------------------------------------------------------|------|
| Selected halogen bonding parameters .....                             | SI2  |
| Packing Diagrams                                                      |      |
| 2( <i>m</i> -F <sub>4</sub> DIB)·(HHDMTZ) (3) .....                   | SI3  |
| 2( <i>p</i> -F <sub>4</sub> DIB)·(HHDMTZ) (4) .....                   | SI4  |
| 3( <i>p</i> -F <sub>4</sub> DIB)·(NMe <sub>4</sub> I) (5) .....       | SI5  |
| 2( <i>m</i> -F <sub>4</sub> DIB)·(NMe <sub>4</sub> I) (6) .....       | SI6  |
| 2( <i>m</i> -F <sub>4</sub> DIB)·(NMe <sub>4</sub> I) (7) .....       | SI7  |
| 2( <i>m</i> -F <sub>4</sub> DIB)·(NMe <sub>4</sub> I) (8) .....       | SI8  |
| ( <i>o</i> -F <sub>4</sub> DIB)·(NMe <sub>4</sub> I) (9) .....        | SI9  |
| 2( <i>o</i> -F <sub>4</sub> DIB)·(NMe <sub>4</sub> I) (10) .....      | SI10 |
| (135-F <sub>3</sub> I <sub>3</sub> B)·(NMe <sub>4</sub> I) (11) ..... | SI11 |
| (135-F <sub>3</sub> I <sub>3</sub> B)·(NMe <sub>4</sub> I) (12) ..... | SI12 |

**Table S11:** Selected halogen bonding parameters (Å, °)

| <b>3</b>     |            |            |            |
|--------------|------------|------------|------------|
| Y–X···A      | Y–X        | X···A      | Y–X···A    |
| C1–I1···N1   | 2.0995(3)  | 2.9640(3)  | 175.27(11) |
| C3–I2···N2   | 2.0902(3)  | 2.9732(3)  | 175.39(10) |
| <b>4</b>     |            |            |            |
| C1–I1···N2   | 2.0911(4)  | 2.8937(4)  | 171.66(14) |
| C5–I2···N1   | 2.1016(4)  | 2.8930(4)  | 175.42(15) |
| <b>5</b>     |            |            |            |
| C1–I1···I8   | 2.0831(13) | 3.5736(11) | 170.45(3)  |
| C4–I2···I8   | 2.0743(11) | 3.5514(11) | 176.84(3)  |
| C7–I3···I7   | 2.0673(11) | 3.6138(12) | 164.11(3)  |
| C7–I3···I6   | 2.0673(11) | 4.0232(11) | 117.81(3)  |
| C10–I4···I8  | 2.0894(11) | 3.5364(10) | 169.75(3)  |
| C13–I5···I7  | 2.0661(16) | 3.4506(13) | 172.55(4)  |
| C16–I6···I7  | 2.0629(14) | 3.4109(13) | 176.90(3)  |
| C16–I6···I3  | 2.0629(14) | 4.0232(11) | 121.67(4)  |
| <b>6</b>     |            |            |            |
| C1–I1···I5   | 2.0992(3)  | 3.5655(3)  | 174.11(10) |
| C7–I3···I5   | 2.0925(3)  | 3.5691(3)  | 167.91(10) |
| C9–I4···I5   | 2.0960(3)  | 3.5961(3)  | 177.05(10) |
| <b>7</b>     |            |            |            |
| C5–I2···I1   | 2.1014(5)  | 3.5186(4)  | 176.55(14) |
| C7–I3···I1   | 2.0937(5)  | 3.6262(5)  | 172.77(13) |
| <b>8</b>     |            |            |            |
| C5–I2···I1   | 2.1081(2)  | 3.5156(2)  | 176.79(10) |
| C7–I3···I1   | 2.0972(2)  | 3.5664(2)  | 171.01(10) |
| C11–I4···I1  | 2.1017(2)  | 3.5148(2)  | 174.55(10) |
| C13–I5···I1  | 2.0918(2)  | 3.6731(2)  | 171.99(10) |
| <b>9</b>     |            |            |            |
| C3–I18···I20 | 2.0987(2)  | 3.5575(5)  | 168.57(7)  |
| C4–I19···I20 | 2.0964(2)  | 3.5589(5)  | 166.99(6)  |
| <b>10</b>    |            |            |            |
| C3–I2···I1   | 2.1053(5)  | 3.5317(10) | 171.07(14) |
| C4–I3···I1   | 2.0949(5)  | 3.7556(10) | 162.55(10) |
| <b>11</b>    |            |            |            |
| C2–I1···I4   | 2.0850(3)  | 3.7492(3)  | 153.69(10) |
| C4–I2···I4   | 2.0967(3)  | 3.4409(3)  | 176.13(10) |
| C6–I3···I4   | 2.0883(3)  | 3.5445(3)  | 166.46(10) |
| <b>12</b>    |            |            |            |
| C4–I2···I1   | 2.1066(4)  | 3.3932(4)  | 177.74(12) |
| C6–I3···I1   | 2.0907(4)  | 3.5683(4)  | 167.51(12) |
| C8–I4···I1   | 2.0821(4)  | 3.7193(4)  | 156.61(12) |

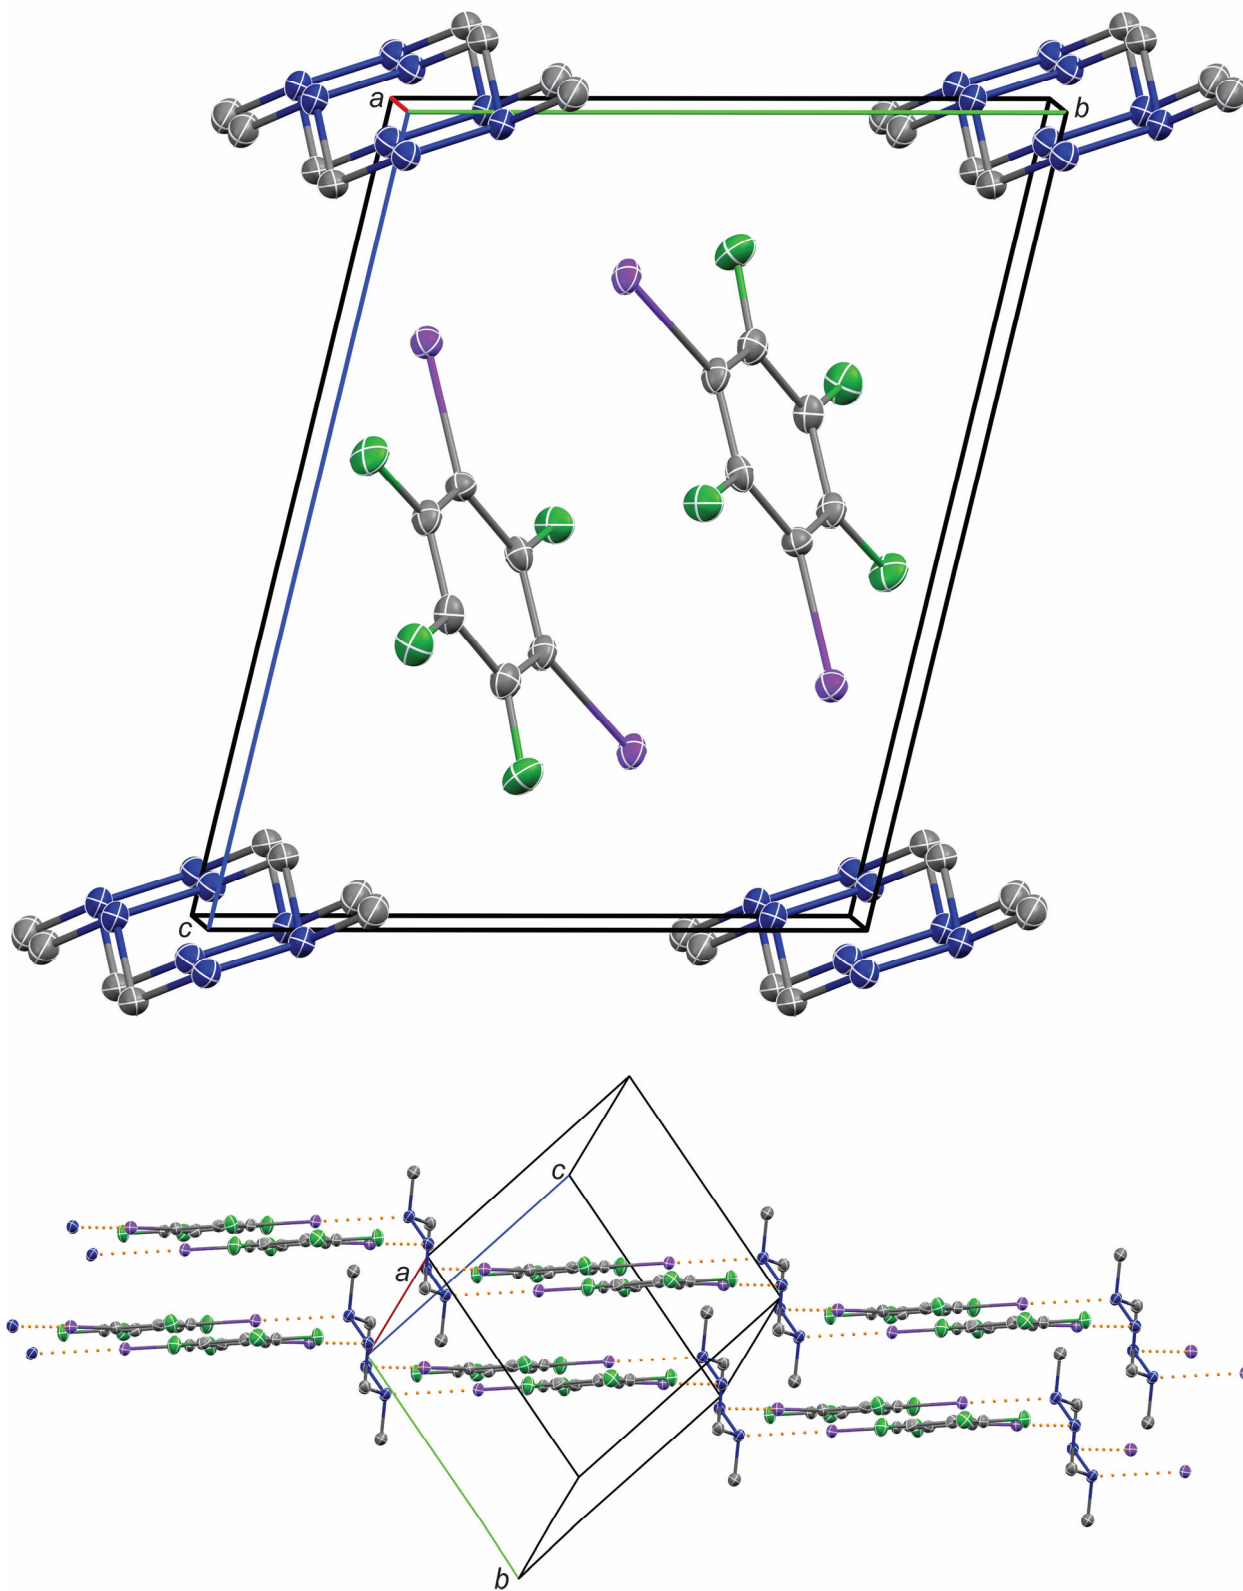

**Figure S11:** Unit cell packing of  $2(m\text{-F}_4\text{DIB})\cdot(\text{HHDMTZ})$  (**3**) as viewed down the *a* axis (top) and halogen bonding chains (bottom). Hydrogen atoms have been omitted for clarity. Thermal ellipsoids are shown at the 50% probability level.

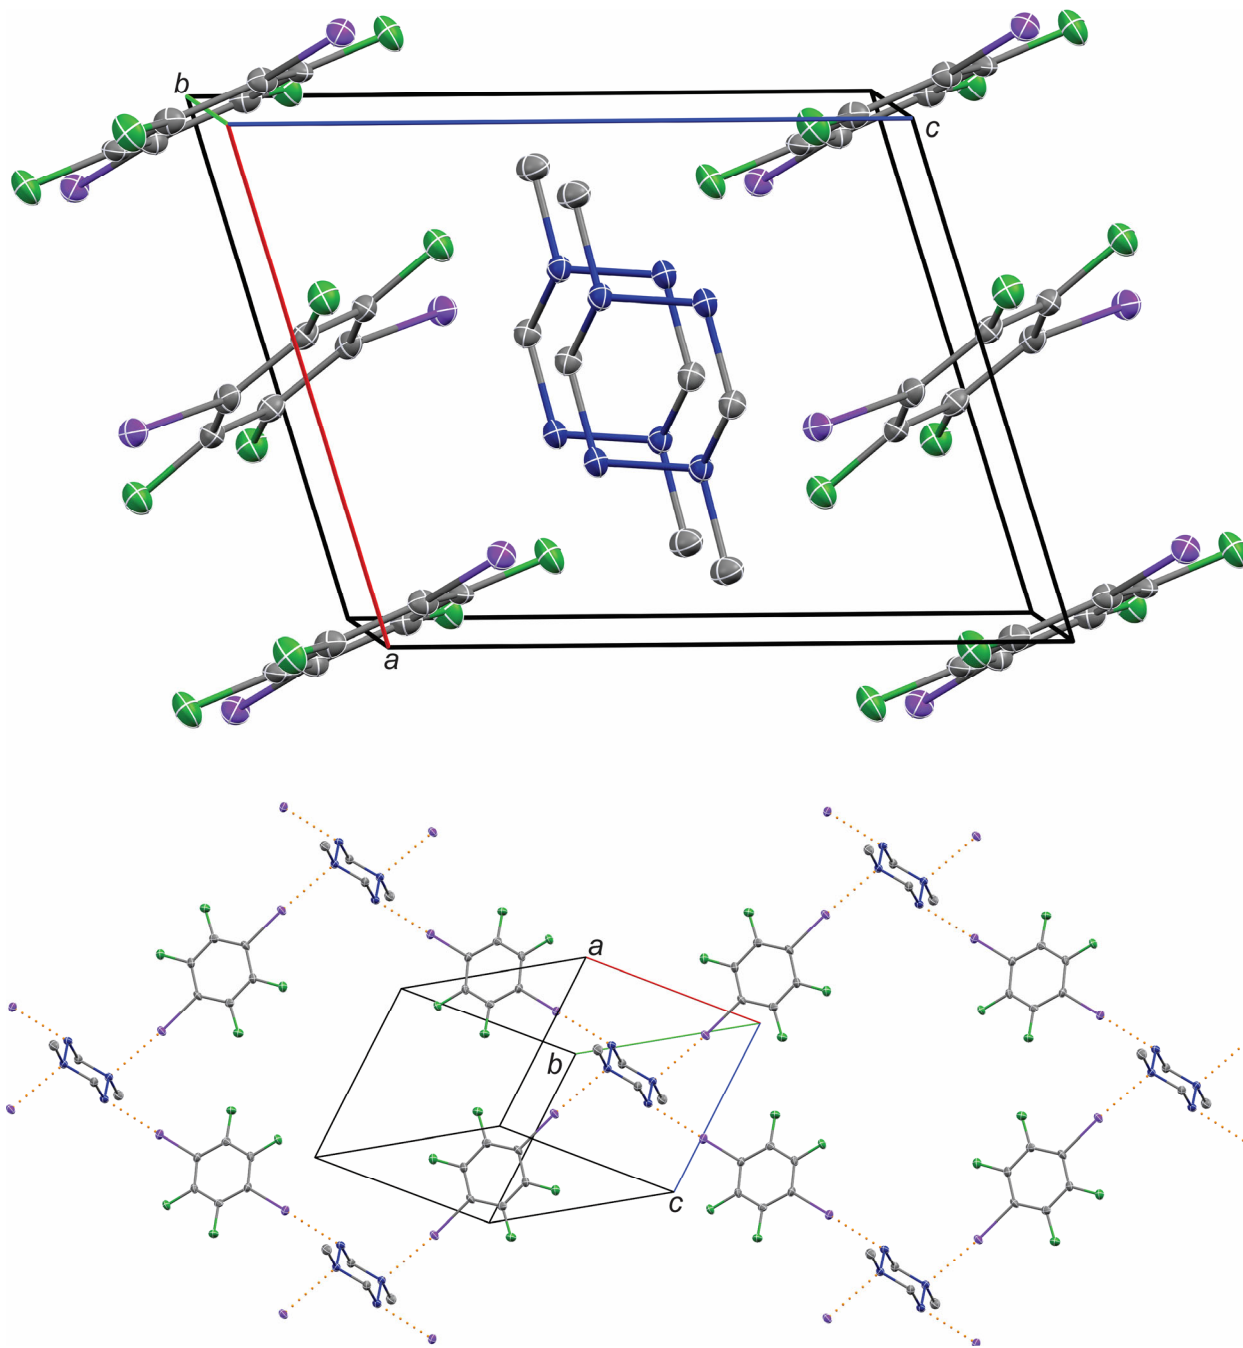

**Figure S12:** Unit cell packing of  $2(p\text{-F}_4\text{DIB})\cdot(\text{HDMTZ})$  (**4**) as viewed down the  $b$  axis (top) and halogen bonding sheets (bottom). Hydrogen atoms have been omitted for clarity. Thermal ellipsoids are shown at the 50% probability level.

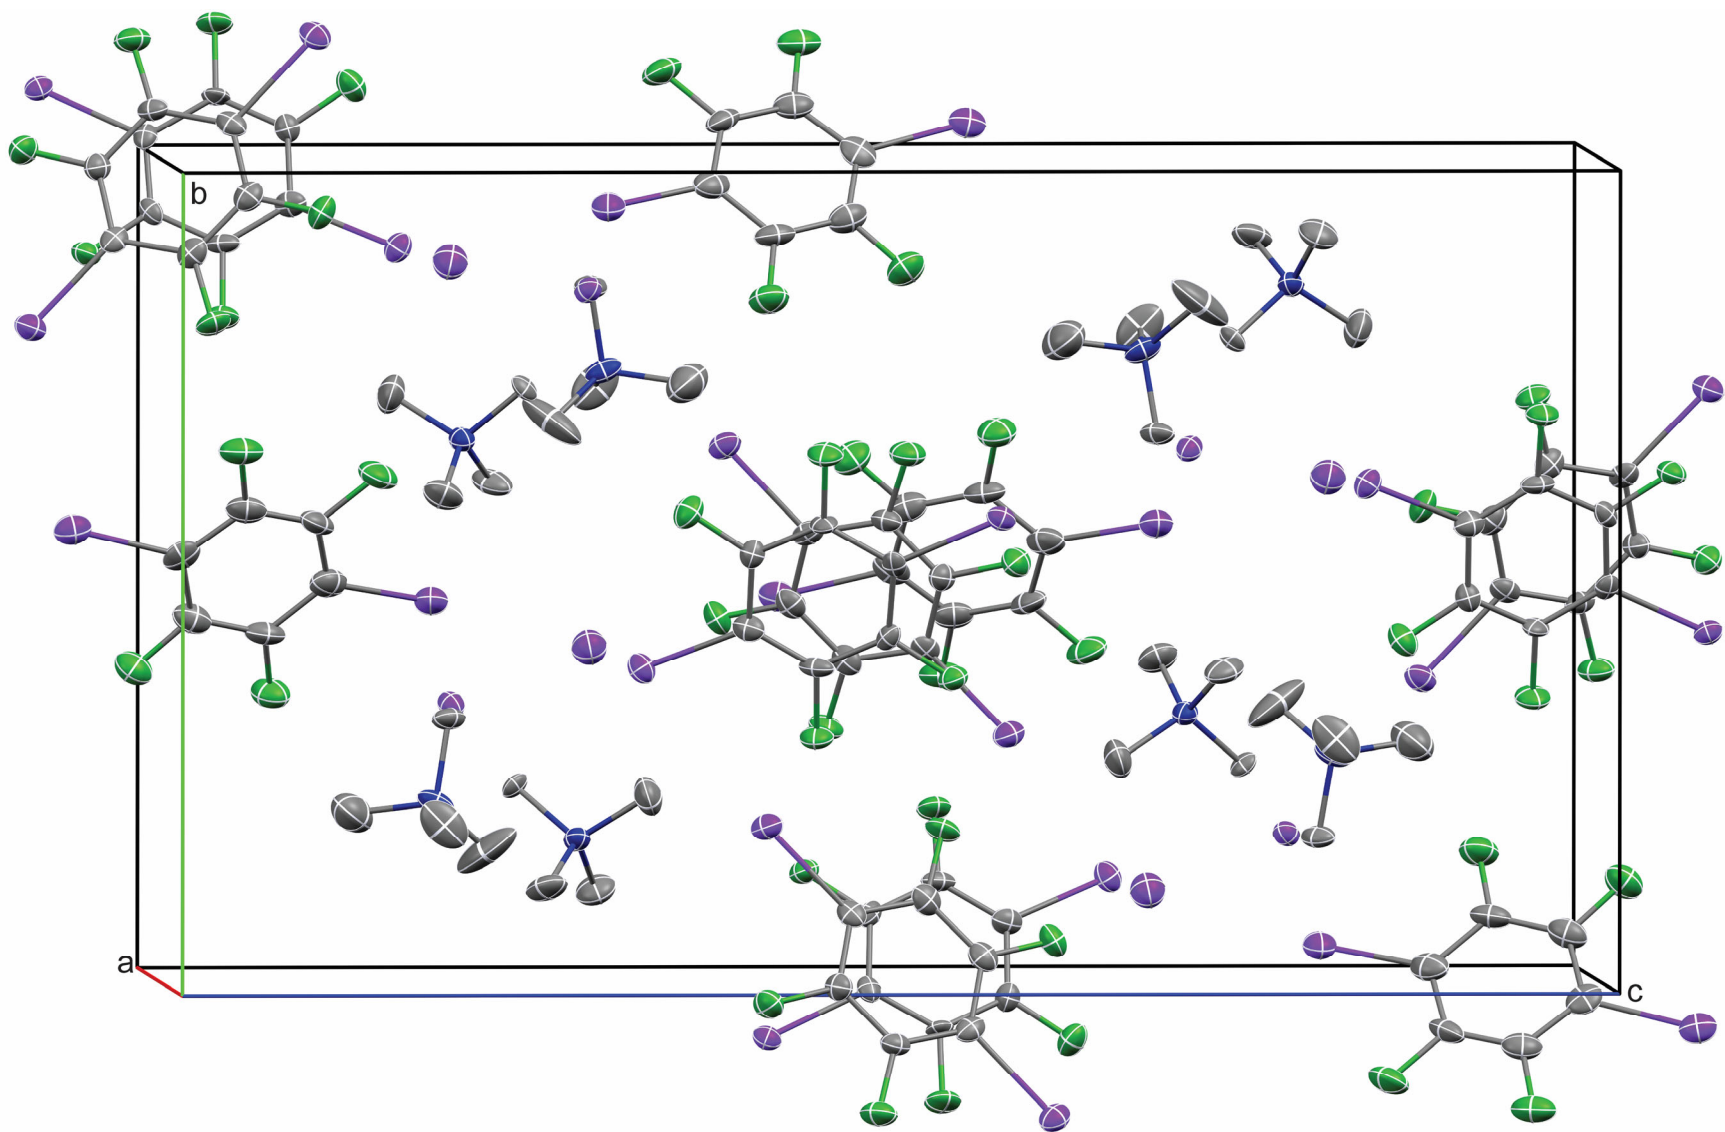

**Figure S13:** Unit cell packing of 3(*p*-F<sub>4</sub>DIB):(NMe<sub>4</sub>I) (**5**) as viewed down the *a* axis. Hydrogen atoms have been omitted for clarity. Thermal ellipsoids are shown at the 50% probability level.

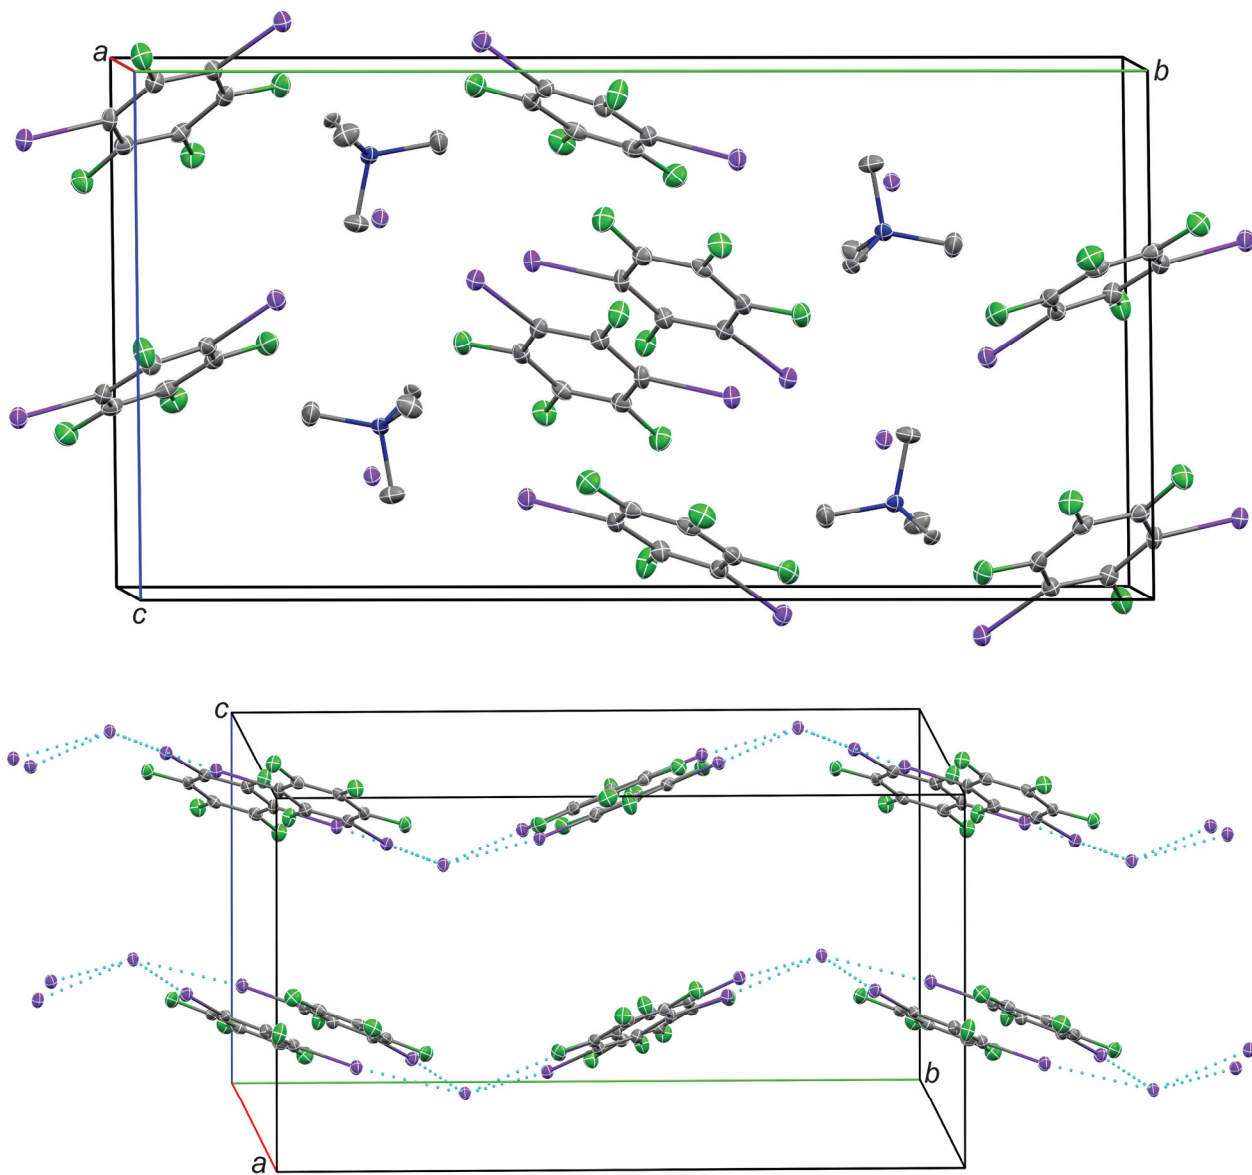

**Figure S14:** Unit cell packing of  $2(m\text{-F}_4\text{DIB}) \cdot (\text{NMe}_4\text{I})$  (**6**) as viewed down the  $a$  axis (top) and halogen bonding ribbons (bottom). Hydrogen atoms have been omitted for clarity. Thermal ellipsoids are shown at the 50% probability level.

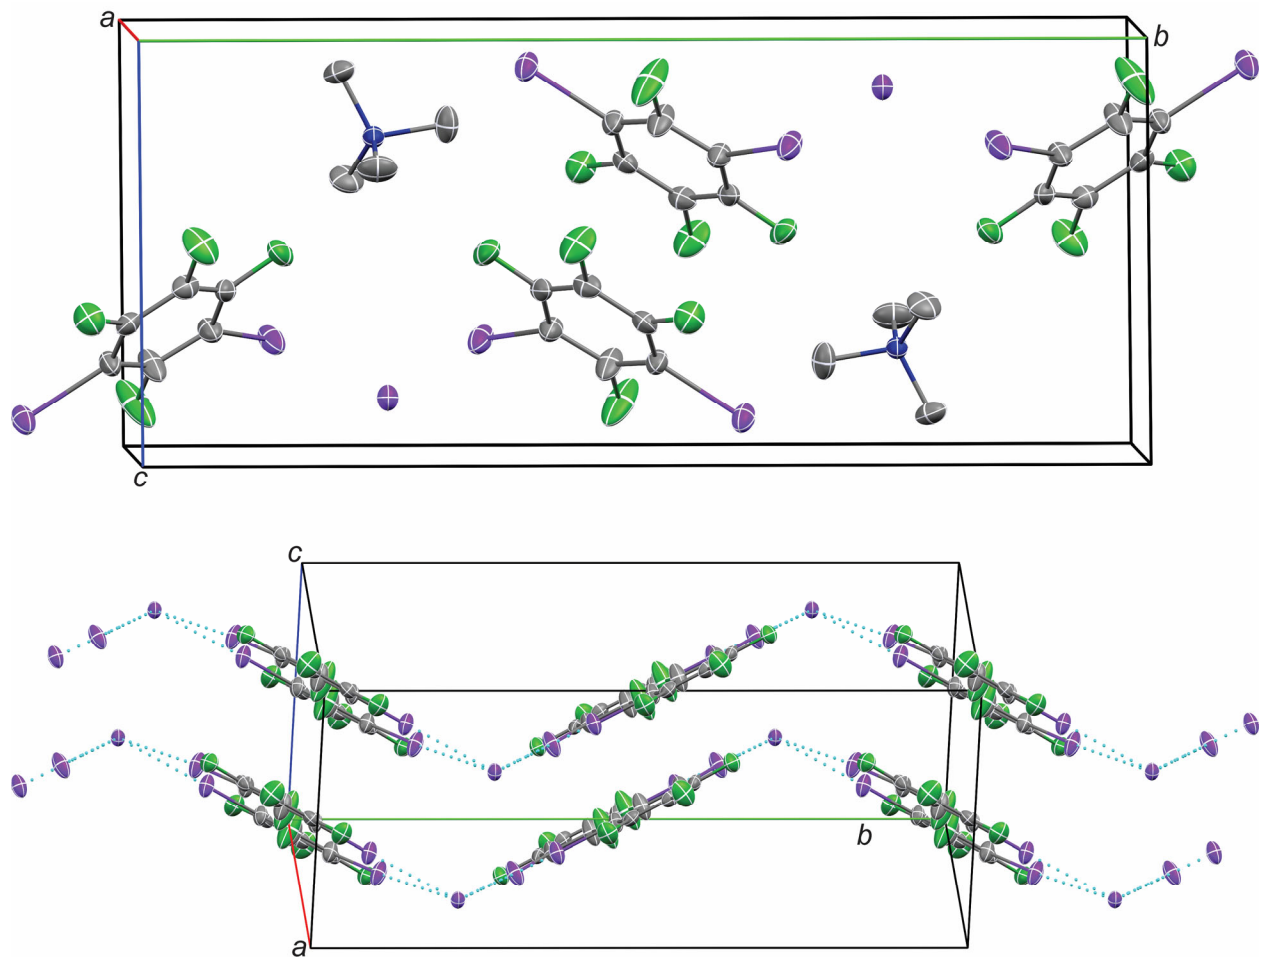

**Figure S15:** Unit cell packing of 2(*m*-F<sub>4</sub>DIB)·(NMe<sub>4</sub>I) (7) as viewed down the *a* axis (top) and halogen bonding ribbons (bottom). Hydrogen atoms have been omitted for clarity. Thermal ellipsoids are shown at the 50% probability level.

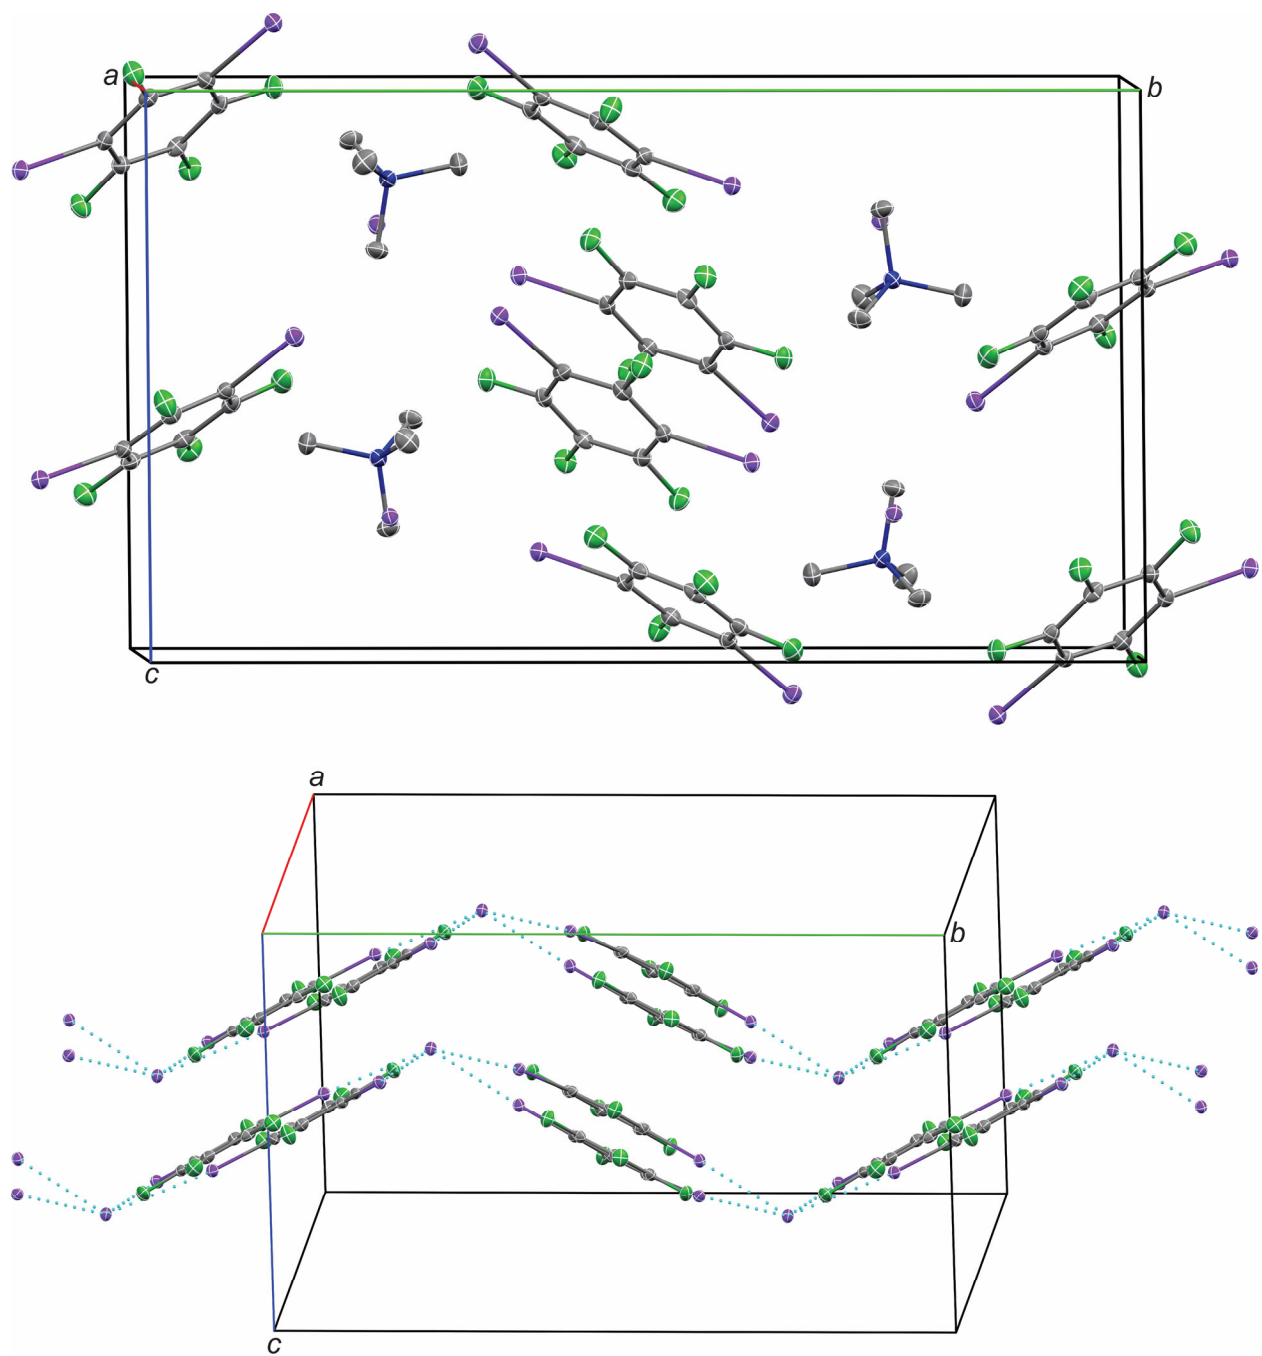

**Figure S16:** Unit cell packing of 2(*m*-F<sub>4</sub>DIB)·(NMe<sub>4</sub>I) (**8**) as viewed down the *a* axis (top) and halogen bonding ribbons (bottom). Hydrogen atoms have been omitted for clarity. Thermal ellipsoids are shown at the 50% probability level.



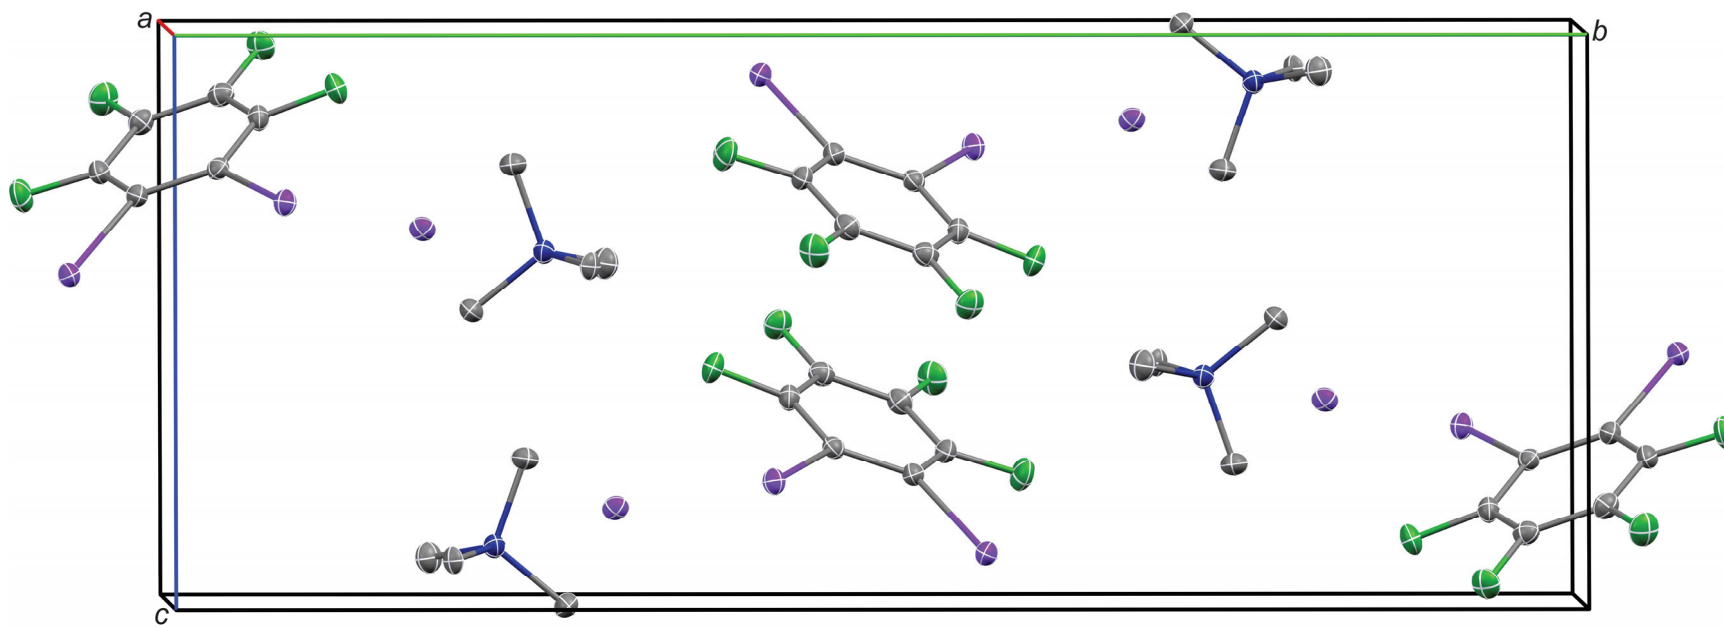

**Figure S17:** Unit cell packing of (o-F<sub>4</sub>DIB)·(NMe<sub>4</sub>I) (9) as viewed down the a axis. Hydrogen atoms have been omitted for clarity. Thermal ellipsoids are shown at the 50% probability level.

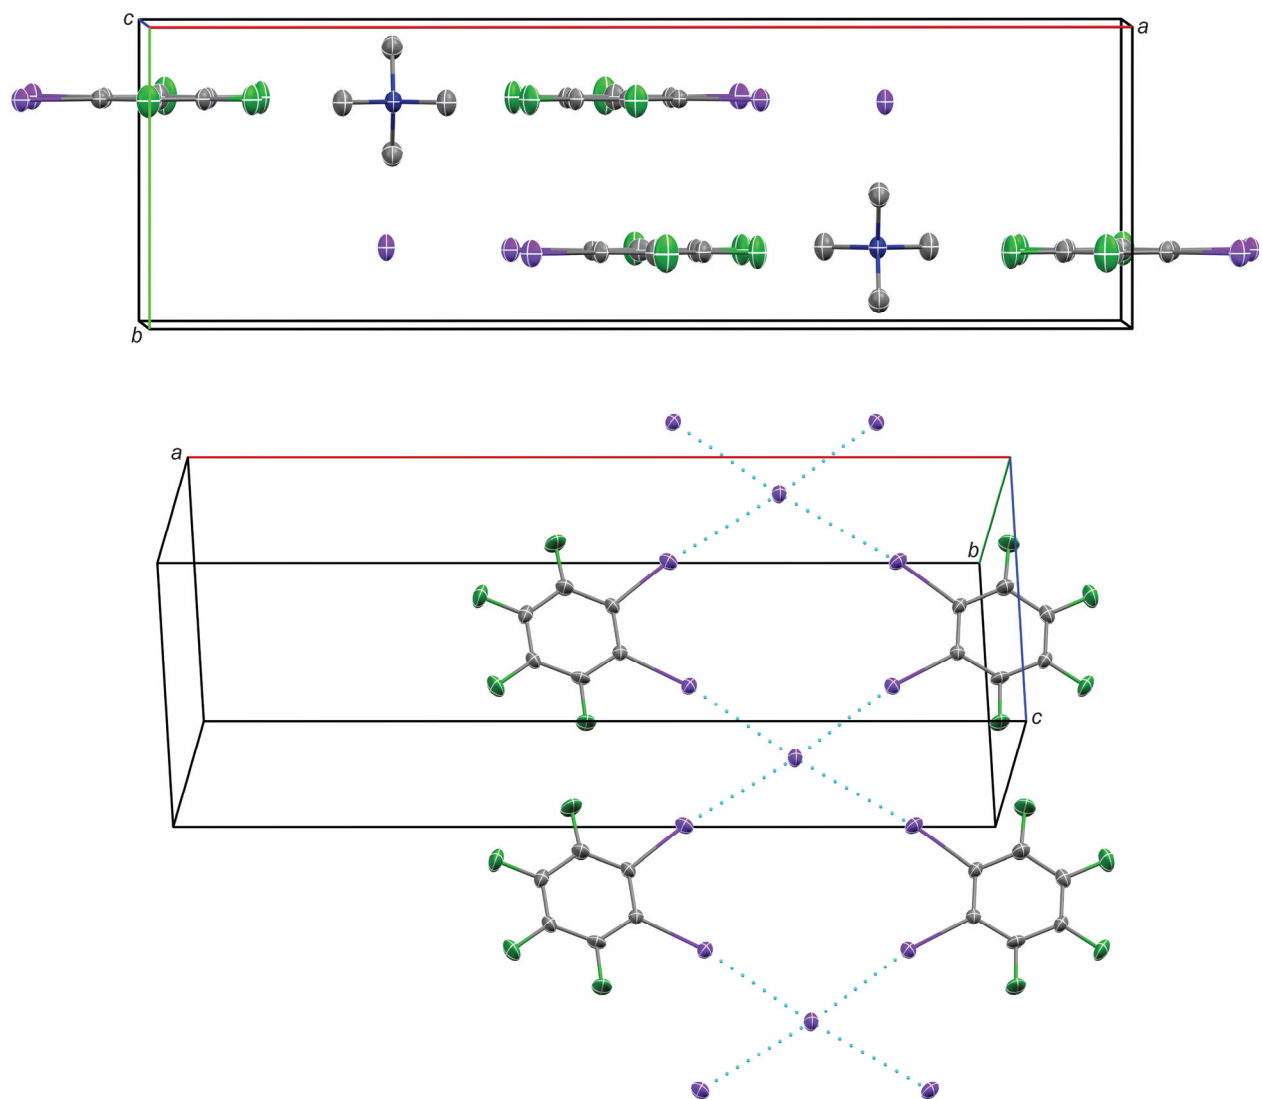

**Figure SI8:** Unit cell packing of 2(o-F<sub>4</sub>DIB)·(NMe<sub>4</sub>I) (**10**) as viewed down the *c* axis (top) halogen bonding ribbons (bottom). Hydrogen atoms have been omitted for clarity. Thermal ellipsoids are shown at the 50% probability level.

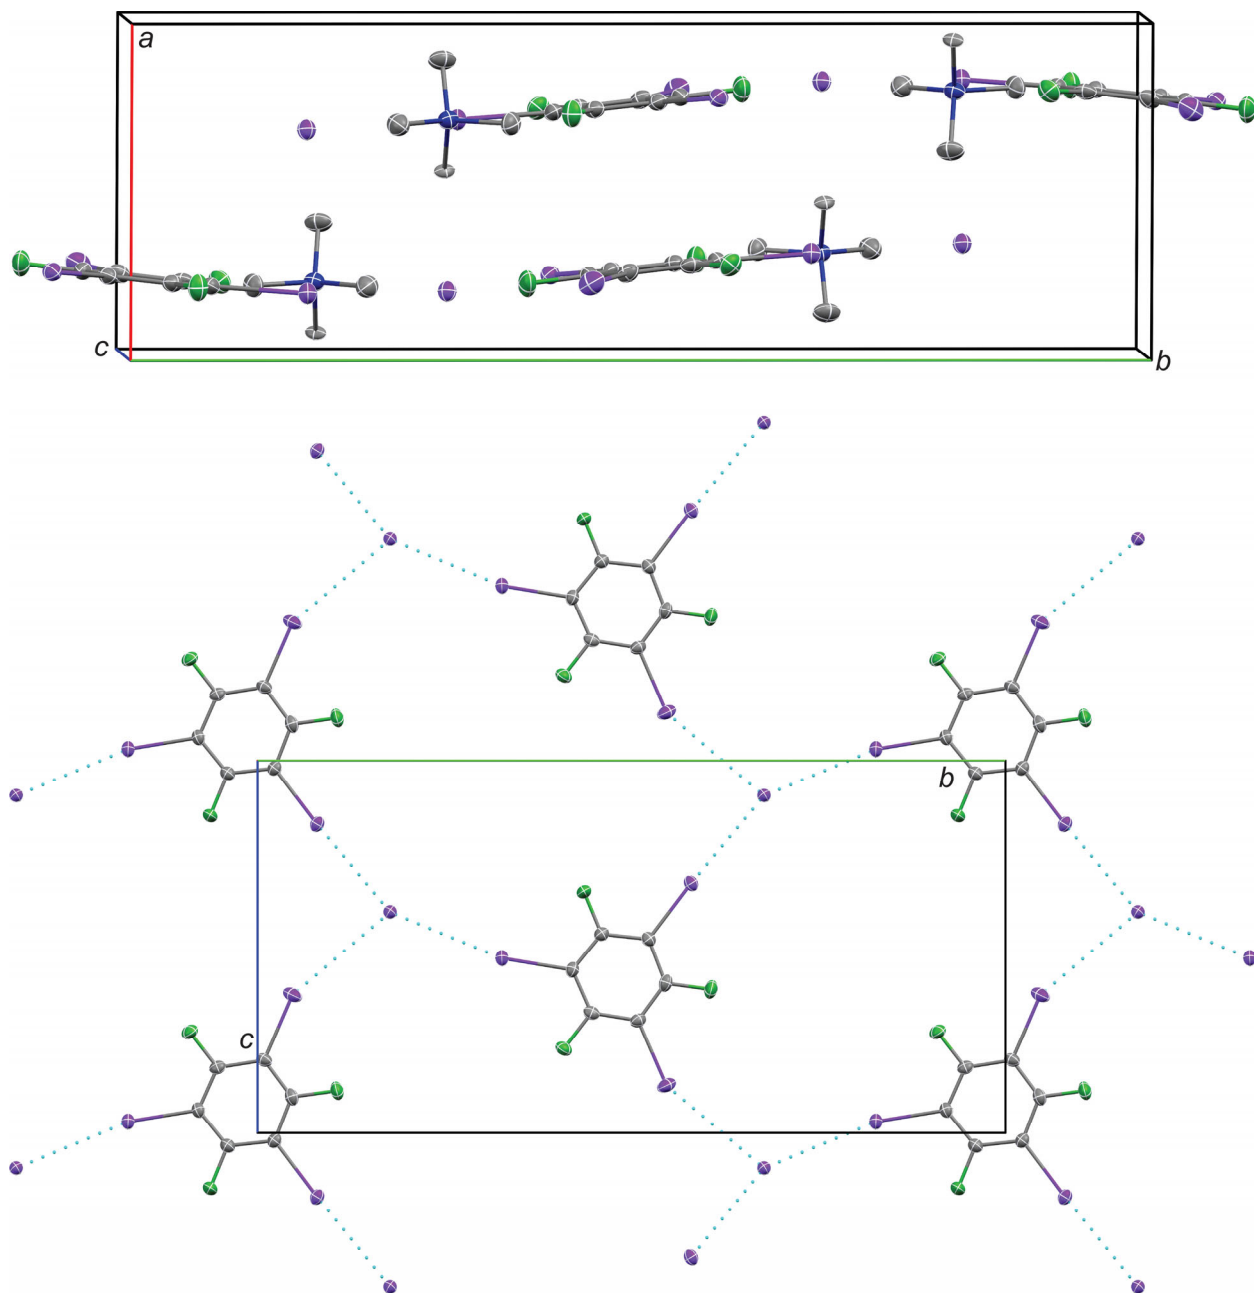

**Figure SI9:** Unit cell packing of (135-F<sub>3</sub>I<sub>3</sub>B)·(NMe<sub>4</sub>) (11) as viewed down the *c* axis (top) and halogen bonding sheets as viewed down the *a* axis (bottom). Hydrogen atoms have been omitted for clarity. Thermal ellipsoids are shown at the 50% probability level.

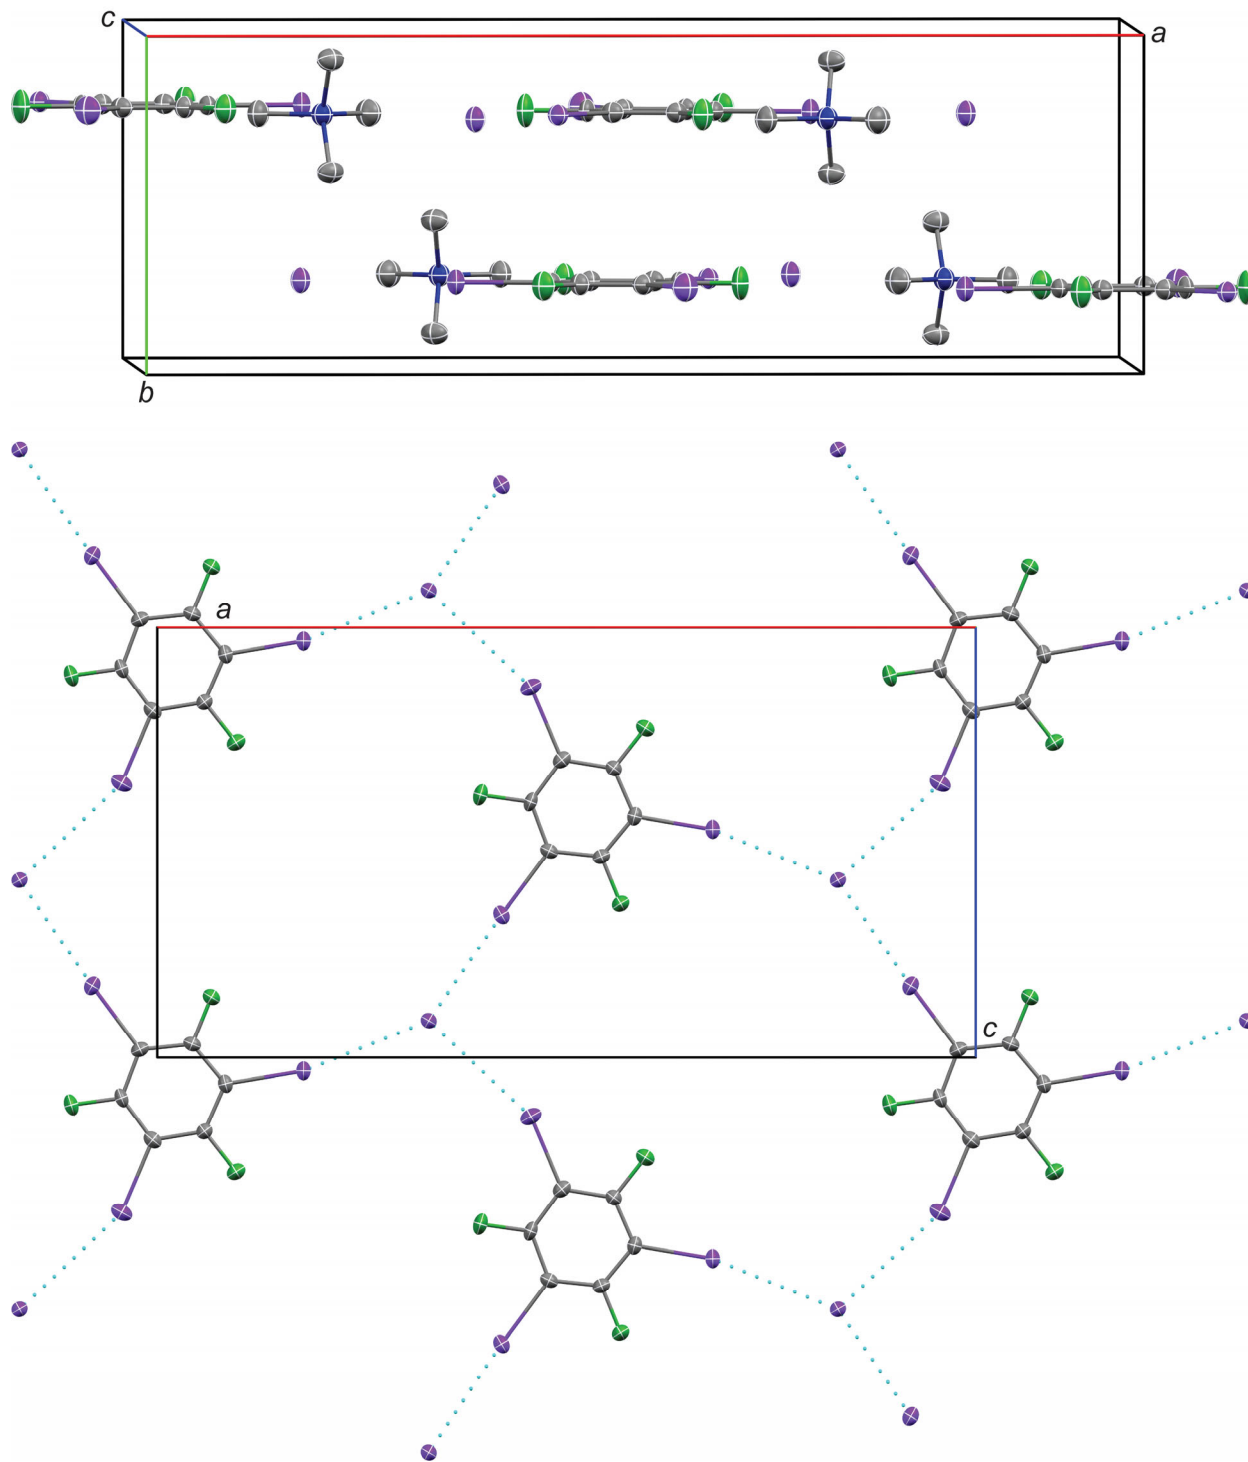

**Figure SI10:** Unit cell packing of  $(135-F_3I_3B) \cdot (NMe_4I)$  (**12**) as viewed down the  $c$  axis (top) and halogen bonding sheets as viewed down the  $b$  axis (bottom). Hydrogen atoms have been omitted for clarity. Thermal ellipsoids are shown at the 50% probability level.
